# Supplementary material
Source: PubMed Central journal article supplement (PMC1482597)
Supplement: pnas_0600001103_9.pdf [file pnas_0600001103_9.pdf]

Table 5. Pattern of resistant mutations isolated from the resistant clones of AP23464 and PD166326

|                                              |                 |                        | AP23464      | PD166326 |        |   |
|----------------------------------------------|-----------------|------------------------|--------------|----------|--------|---|
|                                              |                 |                        | 200 nM       | 50 nM    | 100 nM |   |
| Number of colonies per 10 <sup>7</sup> cells |                 |                        | 33           | 78       | 3      |   |
| <b>CAP</b>                                   | 1               | <b>A34T</b>            | 5            | 21       |        |   |
| <b>SH2</b>                                   | 2               | <b>E138K</b>           |              | 3        |        |   |
| KINASE DOMAIN                                | 3               | L248R                  | 1            | 3        |        |   |
|                                              | 4               | G250E                  |              | 3        |        |   |
|                                              | 5               | Y253H                  |              | 17       |        |   |
|                                              | 6               | E255K                  | 8            | 16       |        |   |
|                                              | 7               | <b>E258K</b>           | 1            | 2        |        |   |
|                                              | 8               | <b>V260G</b>           |              | 1        |        |   |
|                                              | 9               | <b>W261G</b>           |              | 2        |        |   |
|                                              | 10              | <b>L266R</b>           |              | 1        |        |   |
|                                              | 11              | <b>V268G</b>           |              | 1        |        |   |
|                                              | 12              | A269V                  | 1            |          |        |   |
|                                              | 13              | <b>V270G</b>           |              | 1        |        |   |
|                                              | 14              | E275K                  |              | 4        |        |   |
|                                              | 15              | E279K                  |              | 1        |        |   |
|                                              | 16              | E281K                  |              | 2        |        |   |
|                                              | 17              | <b>E282K</b>           | 1            | 1        |        |   |
|                                              | 18              | <b>L284L</b> [TTG=CTG] | 15           |          |        |   |
|                                              | 19              | E286K                  | 1            |          |        |   |
|                                              | 20              | <b>E292K</b>           | 1            | 2        |        |   |
|                                              | 21              | T315I                  | 2            | 1        | 2      |   |
|                                              | 22              | <b>F317C</b>           |              | 1        |        |   |
|                                              | 23              | <b>F317V</b>           |              |          | 1      |   |
|                                              | 24              | <b>S349L</b>           |              | 1        |        |   |
|                                              | 25              | F359C                  |              | 2        |        |   |
|                                              | 26              | <b>L451V</b>           | 1            |          |        |   |
|                                              | 27              | <b>P465K</b>           |              | 3        |        |   |
|                                              |                 |                        | <b>S481C</b> | 1        |        |   |
|                                              | TOTAL MUTATIONS |                        |              | 38       | 89     | 3 |

Screening was performed against 10 million BAF3-BCR/ABL cells generated by transformation with native, non-mutagenised BCR/ABL. Resistant variants that are unique to AP23464 and PD166326 are indicated in bold italics.
