# Supplementary material
Source: PubMed Central journal article supplement (PMC1482597)

**A**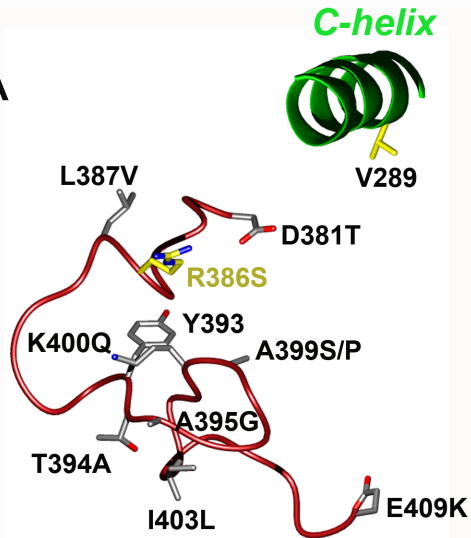**B**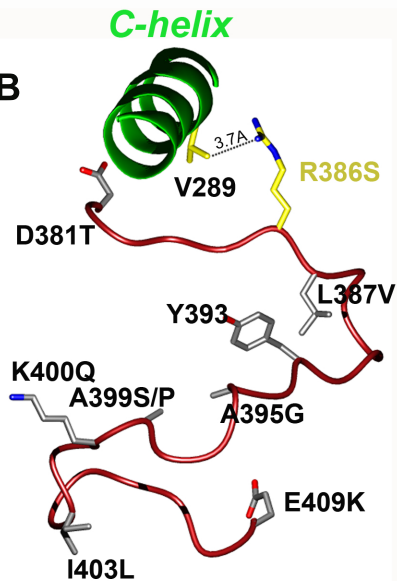**C**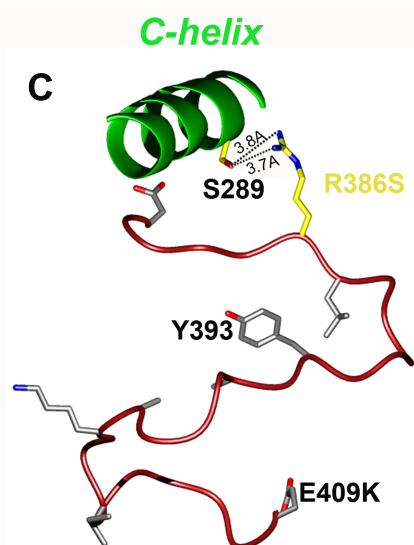

**CLOSED CONFORMATION**  
(10PJ)

**OPEN CONFORMATION**  
(10PK)

**OPEN CONFORMATION**  
(10PK)

Supplement: pnas_0600001103_3.pdf [file pnas_0600001103_3.pdf]
